# Supplementary material for: Identification of 14-3-3γ as a Mieap-interacting protein and its role in mitochondrial quality control
Source: PubMed Central journal article supplement — Sci Rep. 2012 Apr 24;2:379. doi: 10.1038/srep00379 (PMC3334856; doi:10.1038/srep00379), 2012-04-24

## Supplementary Information

### **Identification of 14-3-3 $\gamma$ as a MIEAP-interacting protein and its role in mitochondrial quality control**

Takafumi Miyamoto<sup>1</sup>, Noriaki Kitamura<sup>1</sup>, Masaya Ono<sup>2</sup>, Yasuyuki Nakamura<sup>1</sup>, Masaki Yoshida<sup>1</sup>, Hiroki Kamino<sup>1</sup>, Ryuya Murai<sup>1</sup>, Tesshi Yamada<sup>2</sup>, and Hirofumi Arakawa<sup>1\*</sup>

<sup>1</sup>Division of Cancer Biology, National Cancer Center Research Institute, 5-1-1 Tsukiji, Chuo-ku, Tokyo 104-0045, Japan, <sup>2</sup>Division of Chemotherapy and Clinical Research, National Cancer Center Research Institute, 5-1-1 Tsukiji, Chuo-ku, Tokyo 104-0045, Japan

**Figure S1. Schematic representation of the IP-2DICAL**

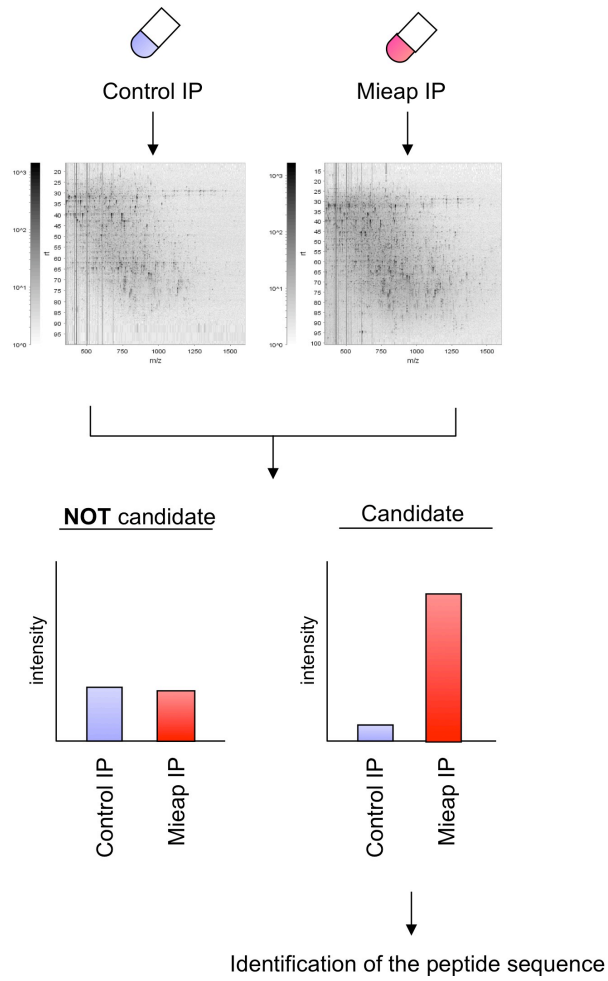

The diagram shows the sequential IP-2DICAL steps for purifying and identifying Mieap-interacting proteins (see Materials and Methods for details).

**Figure S2. MS/MS analysis of the 540  $m/z$  (34.9 min) peak and 822  $m/z$  (44.3 min) peak**

14-3-3 $\gamma$   
540  $m/z$ , 34.9 min

MS/MS Fragmentation of **YLAEVATGEK**  
Found in **1433G\_HUMAN**, 14-3-3 protein gamma OS=Homo sapiens GN=YWHAG PE=1 SV=2

Match to Query 2406: 1079.531898 from(540.773225,2+)  
Title: 459.0  
Data file all.txt

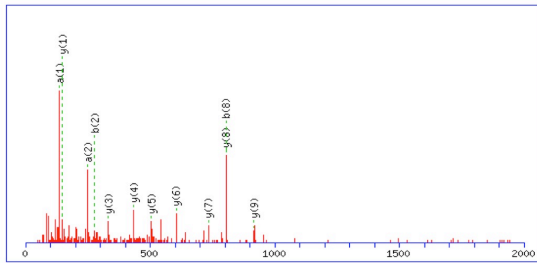

Monoisotopic mass of neutral peptide Mr(calc): 1079.5499  
Ions Score: 49 Expect: 0.0011  
Matches (Bold Red): 12/72 fragment ions using 45 most intense peaks

| #  | a               | a <sup>++</sup> | b               | b <sup>++</sup> | Seq.     | y               | y <sup>++</sup> | y <sup>*</sup> | y <sup>+++</sup> | #         |
|----|-----------------|-----------------|-----------------|-----------------|----------|-----------------|-----------------|----------------|------------------|-----------|
| 1  | <b>136.0757</b> | 68.5415         | 164.0706        | 82.5389         | <b>Y</b> | <b>917.4938</b> | 459.2506        | 900.4673       | 450.7373         | <b>10</b> |
| 2  | <b>249.1598</b> | 125.0835        | <b>277.1547</b> | 139.0810        | <b>L</b> | <b>917.4938</b> | 459.2506        | 900.4673       | 450.7373         | <b>9</b>  |
| 3  | 320.1969        | 160.6021        | 348.1918        | 174.5995        | <b>A</b> | <b>804.4098</b> | 402.7085        | 787.3832       | 394.1953         | <b>8</b>  |
| 4  | 449.2395        | 225.1234        | 477.2344        | 239.1208        | <b>E</b> | <b>733.3727</b> | 367.1900        | 716.3461       | 358.6767         | <b>7</b>  |
| 5  | 548.3079        | 274.6576        | 576.3028        | 288.6550        | <b>V</b> | <b>604.3301</b> | 302.6687        | 587.3035       | 294.1554         | <b>6</b>  |
| 6  | 619.3450        | 310.1761        | 647.3399        | 324.1736        | <b>A</b> | <b>505.2617</b> | 253.1345        | 488.2351       | 244.6212         | <b>5</b>  |
| 7  | 720.3927        | 360.7000        | 748.3876        | 374.6974        | <b>T</b> | <b>434.2245</b> | 217.6159        | 417.1980       | 209.1026         | <b>4</b>  |
| 8  | 777.4141        | 389.2107        | <b>805.4090</b> | 403.2082        | <b>G</b> | <b>333.1769</b> | 167.0921        | 316.1503       | 158.5788         | <b>3</b>  |
| 9  | 906.4567        | 453.7320        | 934.4516        | 467.7295        | <b>E</b> | 276.1554        | 138.5813        | 259.1288       | 130.0681         | <b>2</b>  |
| 10 |                 |                 |                 |                 | <b>K</b> | <b>147.1128</b> | 74.0600         | 130.0863       | 65.5468          | <b>1</b>  |

14-3-3 $\gamma$   
822  $m/z$ , 44.3 min

MS/MS Fragmentation of **NVTELNEPLSNEER**  
Found in **1433G\_HUMAN**, 14-3-3 protein gamma OS=Homo sapiens GN=YWHAG PE=1 SV=2

Match to Query 4956: 1642.798226 from(822.406389,2+)  
Title: 228.0  
Data file all.txt

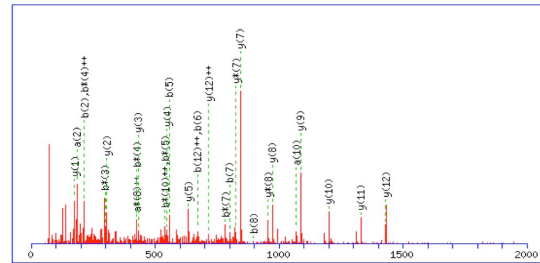

Monoisotopic mass of neutral peptide Mr(calc): 1642.7798  
Ions Score: 57 Expect: 0.0011  
Matches (Bold Red): 29/156 fragment ions using 81 most intense peaks

| #  | a                | a <sup>++</sup> | a <sup>+</sup> | a <sup>+++</sup> | b               | b <sup>++</sup> | b <sup>+</sup>  | b <sup>+++</sup> | Seq.     | y                | y <sup>++</sup> | y <sup>+</sup> | y <sup>+++</sup> | #         |
|----|------------------|-----------------|----------------|------------------|-----------------|-----------------|-----------------|------------------|----------|------------------|-----------------|----------------|------------------|-----------|
| 1  | 87.0553          | 44.0313         | 70.0287        | 35.5180          | 115.0502        | 58.0287         | 98.0237         | 49.5155          | <b>N</b> |                  |                 |                |                  | <b>14</b> |
| 2  | <b>186.1237</b>  | 93.5655         | 169.0972       | 85.0522          | <b>214.1186</b> | 107.5629        | 197.0921        | 99.0497          | <b>V</b> | 1529.7442        | 765.3757        | 1512.7176      | 756.8625         | <b>13</b> |
| 3  | 287.1714         | 144.0893        | 270.1440       | 135.5761         | 315.1663        | 156.0863        | 298.1397        | 149.5753         | <b>T</b> | 1430.6758        | 715.8415        | 1413.6492      | 707.3263         | <b>12</b> |
| 4  | 416.2140         | 208.6106        | 399.1874       | 200.0974         | 444.2089        | 222.6081        | <b>427.1823</b> | <b>214.0948</b>  | <b>E</b> | 1329.6281        | 665.3177        | 1312.6015      | 656.8044         | <b>11</b> |
| 5  | 529.2980         | 265.1527        | 512.2715       | 256.6394         | <b>557.2930</b> | 279.1501        | <b>540.2664</b> | 270.6368         | <b>L</b> | 1200.5855        | 600.7964        | 1183.5590      | 592.2831         | <b>10</b> |
| 6  | 643.3410         | 322.1741        | 626.3144       | 313.6608         | <b>671.3359</b> | 336.1716        | 654.3093        | 327.6583         | <b>N</b> | <b>1087.5014</b> | 544.2544        | 1070.4749      | 535.7411         | <b>9</b>  |
| 7  | 772.3836         | 386.6954        | 755.3570       | 378.1821         | <b>800.3785</b> | 400.6929        | <b>783.3519</b> | 392.1796         | <b>E</b> | 973.4585         | 487.2329        | 956.4320       | 478.7196         | <b>8</b>  |
| 8  | 869.4163         | 435.2118        | 852.4098       | 426.7085         | <b>897.4312</b> | 449.2193        | 880.4047        | 440.7060         | <b>F</b> | <b>844.4159</b>  | 422.7116        | 827.3894       | 414.1963         | <b>7</b>  |
| 9  | 982.5204         | 491.7638        | 964.4938       | 483.2506         | 1010.5153       | 505.7613        | 993.4888        | 497.2480         | <b>L</b> | 747.3652         | 374.1852        | 730.3366       | 365.6719         | <b>6</b>  |
| 10 | <b>1069.5524</b> | 535.2798        | 1052.5299      | 526.7666         | 1097.5473       | 549.2773        | 1080.5208       | <b>540.7640</b>  | <b>N</b> | 634.2791         | 317.6432        | 617.2523       | 309.1299         | <b>5</b>  |
| 11 | 1183.5953        | 592.3013        | 1166.5688      | 583.7880         | 1211.5903       | 606.2983        | 1194.5637       | 597.7855         | <b>N</b> | <b>547.2041</b>  | 274.1272        | 530.2205       | 265.6139         | <b>4</b>  |
| 12 | 1312.6379        | 656.8226        | 1295.6114      | 648.3093         | 1340.6328       | <b>670.8201</b> | 1323.6063       | 662.3068         | <b>E</b> | <b>433.2041</b>  | 217.1057        | 416.1776       | 208.5924         | <b>3</b>  |
| 13 | 1441.6805        | 721.3439        | 1424.6540      | 712.8306         | 1469.6754       | 735.3414        | 1452.6489       | 726.8281         | <b>E</b> | <b>304.1615</b>  | 152.5844        | 287.1350       | 144.0711         | <b>2</b>  |
| 14 |                  |                 |                |                  |                 |                 |                 |                  | <b>R</b> | 175.1390         | 88.0631         | 158.0924       | 79.5498          | <b>1</b>  |

The tandem mass spectrometry spectra (*top*) and peptide fragmentation table (*bottom*) of the 540  $m/z$  (34.9 min) peak and 822  $m/z$  (44.3 min) peak are shown. All identified molecular weights in the spectra are shown in the table (refer to [http://www.matrixscience.com/help/fragmentation\\_help.html](http://www.matrixscience.com/help/fragmentation_help.html)). The red numbers indicate the corresponding molecular weight of the detected fragments. Two different peptides (YLAEVATGEK and NVTELNEPLSNEER) from 14-3-3 $\gamma$  were identified as fragments of the Micap-interacting protein.

**Figure S3. The peak at 822  $m/z$  and 44.3 min displayed in various combinations of axes**

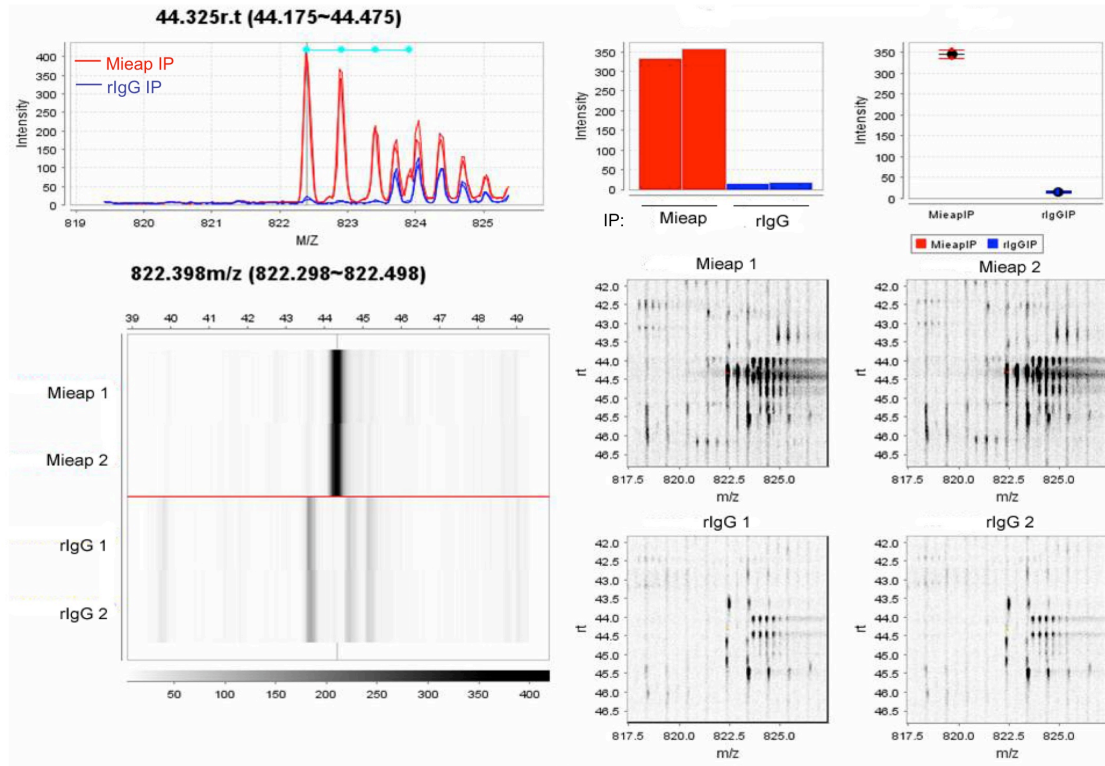

The immunoprecipitates generated using anti-Mieap antibody are indicated in *red*, and the immunoprecipitates generated using rIgG are indicated in *blue*. *Upper left*,  $m/z$  and intensity axes with indicators of isotopic mass (*light blue line and dot*). *Lower left*, a gray-scale intensity pattern for RT ( $x$  axis) and the sample ( $y$  axis). *Upper right*, the sample and intensity axes (*left*) and a *box-and-whisker diagram* of the immunoprecipitates generated using anti-Mieap antibody and rIgG (*right*). *Lower right*, the  $m/z$  and RT axes with high (*upper*) and low (*lower*) intensities are indicated by a *red dot*.

**Figure S4. Sequence alignment of human 14-3-3 isotypes.**

```

BETA  MTMDKSELVQKAKLAEQAERYDDMAAAMKAVTEQGHELNSNEERNLLSVAYKNVVGARRSSWRVISSIEQKT
GAMMA  -MVDREQLVQKARLAEQAERYDDMAAAMKNVTELNELNSNEERNLLSVAYKNVVGARRSSWRVISSIEQKT
EPSILON -MDDREDLVYQAKLAEQAERYDEMVESMKKVAGMDVELTVEERNLLSVAYKNVIGARRASWRIISSIEQKE
ETA    -MGDREQLLQARLAEQAERYDDMASAMKAVTELNELNSNEDRNLLSVAYKNVVGARRSSWRVISSIEQKT
SIGMA  --MERASLIQKAKLAEQAERYEDMAAFMKGAVTEKGEELNSCEERNLLSVAYKNVVGGRRAAWRVLSSIEQKS
THETA  --MEKTELIQKAKLAEQAERYDDMATCMKAVTEQGAELNSNEERNLLSVAYKNVVGRRSAWRVISSIEQKT
ZETA   --MDKNELVQKAKLAEQAERYDDMAACMKSVTEQGAELNSNEERNLLSVAYKNVVGARRSSWRVSSIEQKT

BETA  E--RNEKKQQMGKEYREKIEAELQDICNDVLELLDKYLIP--NATQPESKVFYLLKMGDYFRYLSEVASGD
GAMMA  SADGNEKKIEMVRAYREKIEKELEAVCQDVLSLLDNYLIKNCSETQYESKVFYLLKMGDYRYLAEVATGE
EPSILON ENKGGEDKLMIREYRQMVETELKLICCDILDVLDKHLIP--AANTGESKVFYLLKMGDYHRYLAEFATGN
ETA    MADGNEKKLEKVKAYREKIEKELETVCNDVLSLLDKFLIKNCNDFQYESKVFYLLKMGDYRYLAEVASGE
SIGMA  NEEGSEKKGPEVREYREKVETELQGVCTVLGLLDSHLIK--EAGDAESRVFYLKMGDYRYLAEVATGD
THETA  D--TSDKKLQLIKDYREKVESELRSICTTVLELLDKYLIA--NATNPESKVFYL-MKGDYFRYLAEVACGD
ZETA   E--GAEKKQQMAREYREKIETELRDICNDVLSLLEKFLIP--NASQAESKVFYLLKMGDYRYLAEVAAGD

BETA  NKQTTVSNSQQAYQEAFEISKKEMQPTHPIRLGLALNFSVFYIEILNSPEKACSLAKTAFDEAIAELDTLN
GAMMA  KRATVVESSEKAYSEAHEISKEHMQPTHPIRLGLALNYSVFYIEIQNAPEQACHLAKTAFDDAIAELDTLN
EPSILON DRKEAAENSLVAYKAASDIAMTELPTHPIRLGLALNFSVFYIEILNSPDRACRLAKAAFDDAIAELDTLS
ETA    KKNSVVEASEAAYKEAFEISKEQMPTHPIRLGLALNFSVFYIEIQNAPEQACLAKQAFDDAIAELDTLN
SIGMA  DKKRIIDSARSAYQEAMDISKKEMPPTNPIRLGLALNFSVFHYEIANSPPEAISLAKTTFDEAMADLHTLS
THETA  DRKQTIDNSQGAYQEAFDISKKEMQPTHPIRLGLALNFSVFYIEILNNPELACTLAKTAFDEAIAELDTLN
ZETA   DKKGIVDQSQAYQEAFEISKKEMQPTHPIRLGLALNFSVFYIEILNSPEKACSLAKTAFDEAIAELDTLS

BETA  EESYKDSTLIMQLLRDNLTLWTSENQGDEGDAGEGEN-----
GAMMA  EDSYKDSTLIMQLLRDNLTLWTSDQDDGGEGGN-----
EPSILON EESYKDSTLIMQLLRDNLTLWTSDMQGDGEEQNKEALQDVEDENQ
ETA    EDSYKDSTLIMQLLRDNLTLWTSDQDEEEAGEGN-----
SIGMA  EDSYKDSTLIMQLLRDNLTLWTADNAGEEGGEAPQEPQS-----
THETA  EDSYKDSTLIMQLLRDNLTLWTSDSAGEECDAEAGAEN-----
ZETA   EESYKDSTLIMQLLRDNLTLWTSDQDEAEAGEGEN-----

```

The residues conserved in at least six of the seven 14-3-3 isotypes are shown in red letters. The peptide sequences identified by IP-2DICAL are shaded gray.

**Figure S5. Mitochondrial localization of 14-3-3 $\gamma$  during MALM**

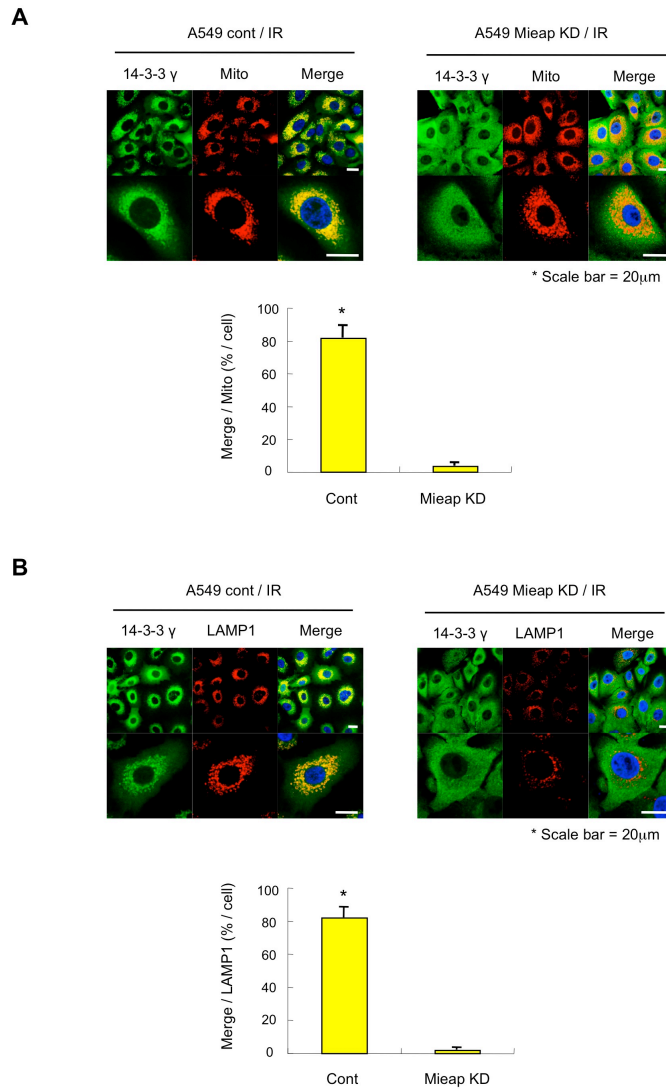

The control and Mieap-KD A549 cells were subjected to IF analysis on day 3 after the IR. The 14-3-3 $\gamma$  protein was stained with anti-14-3-3 $\gamma$  antibody (14-3-3 $\gamma$ : green). The lysosomes were stained with anti-LAMP1 antibody (LAMP1: red). The mitochondria are indicated by the DsRed-Mito protein signal (Mito: red). The yellow area indicates overlapping between 14-3-3 $\gamma$  and either mitochondria or lysosomes. A quantitative analysis of the yellow and red area was performed using 300–400 cells. The average values for the ratio of yellow to red (merged/mitochondria or lysosomes; yellow bar graph) are shown, with error bars indicating 1 SD.  $P < 0.01$  (\*) was considered statistically significant. Scale bar = 20  $\mu$ m.

**Figure S6. 14-3-3 $\gamma$  expression was inhibited by two shRNAs, 14-3-3 $\gamma$ -KD1 and 14-3-3 $\gamma$ -KD2**

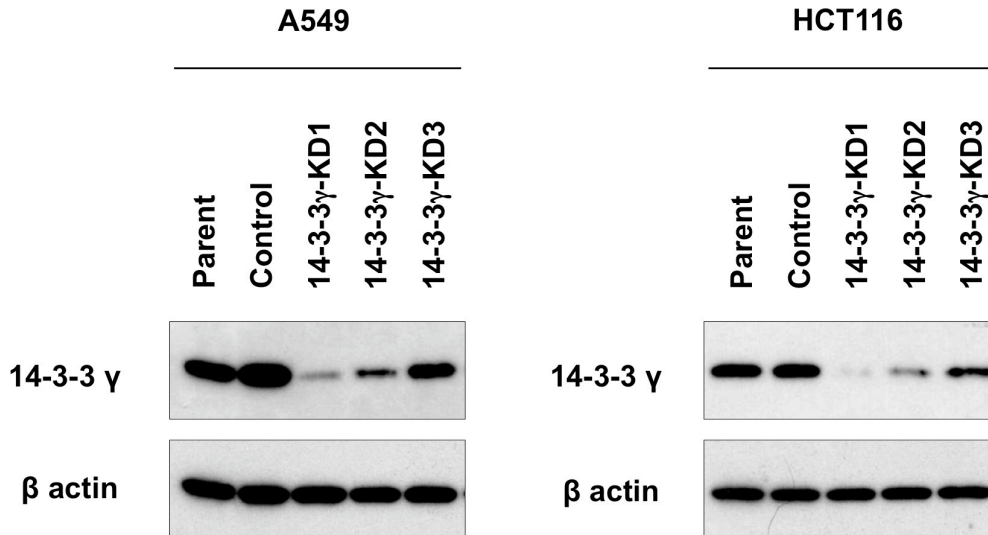

The indicated cells were subjected to Western blot analysis with anti-14-3-3 $\gamma$  antibody. Parent: A549 and HCT116 cells, Control: A549 and HCT116 cells infected with an empty retroviral vector, 14-3-3 $\gamma$ -KD1: A549 and HCT116 cells infected with the retrovirus vector expressing shRNA 14-3-3 $\gamma$ -KD1, 14-3-3 $\gamma$ -KD2: A549 and HCT116 cells infected with the retrovirus vector expressing shRNA 14-3-3 $\gamma$ -KD2, and 14-3-3 $\gamma$ -KD3: A549 and HCT116 cells infected with a retrovirus vector expressing shRNA 14-3-3 $\gamma$ -KD3. The A549 and HCT116 cells infected with the retrovirus vector expressing shRNA 14-3-3 $\gamma$ -KD1 were used as the 14-3-3 $\gamma$  KD cells in all of the experiments in the manuscript.

**Figure S7. Neutralizing the acidic status of lysosomes with NH<sub>4</sub>Cl causes the accumulation of oxidized mitochondrial proteins**

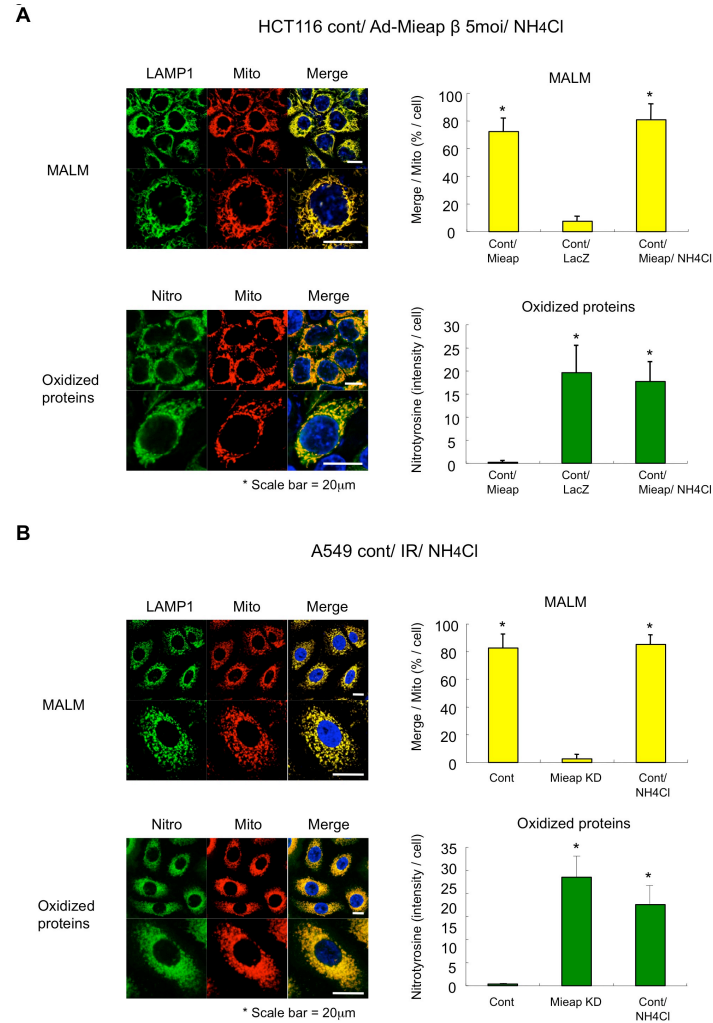

(A and B) An IF analysis of MALM and oxidized proteins. The Ad-Mieap- $\beta$ - and Ad-LacZ-infected control HCT116 cells (A) or the control and Mieap-KD A549 cells were  $\gamma$ -irradiated; 3 days after the IR, an IF analysis was performed using anti-LAMP1 antibody (LAMP1) to detect MALM (MALM) or using anti-nitrotyrosine antibody (Nitro) to detect nitrotyrosine-oxidized proteins (Oxidized proteins). To evaluate the role of lysosomes, NH<sub>4</sub>Cl was added to the Ad-Mieap- $\beta$ -infected HCT116 control cells and A549 control cells on day 2 after the IR. The mitochondria are indicated by the DsRed-mito protein signal (Mito). Representative images are shown (upper panel of A or B). Quantitative analyses of the MALM and nitrotyrosine intensities were performed using 300-400 cells. The average intensities of the MALM and nitrotyrosine-oxidized proteins per cell are shown, with error bars indicating 1 standard deviation (SD; lower panel).  $P < 0.01$  (\*) was considered statistically significant. Scale bar = 20  $\mu$ m.



# Figure S8. Full-length blots

## Figure 3b

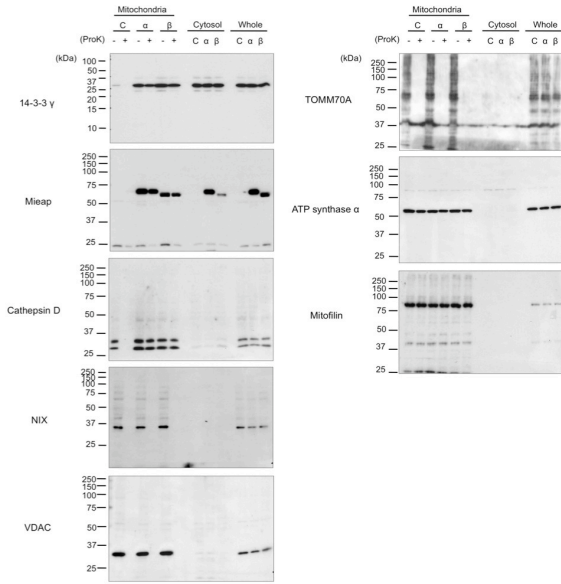

## Figure 3c

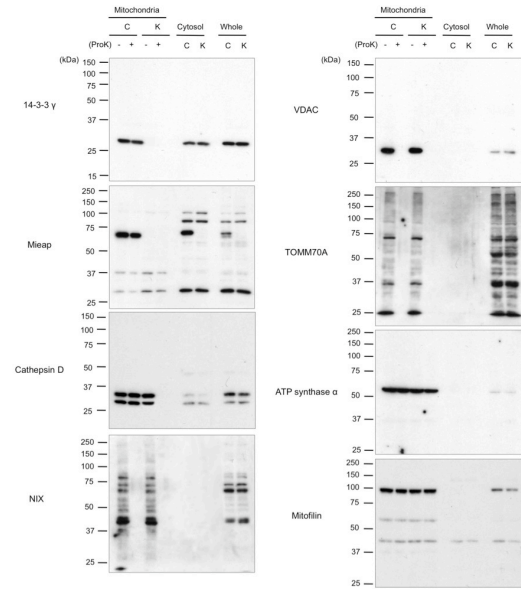

## Figure 4a

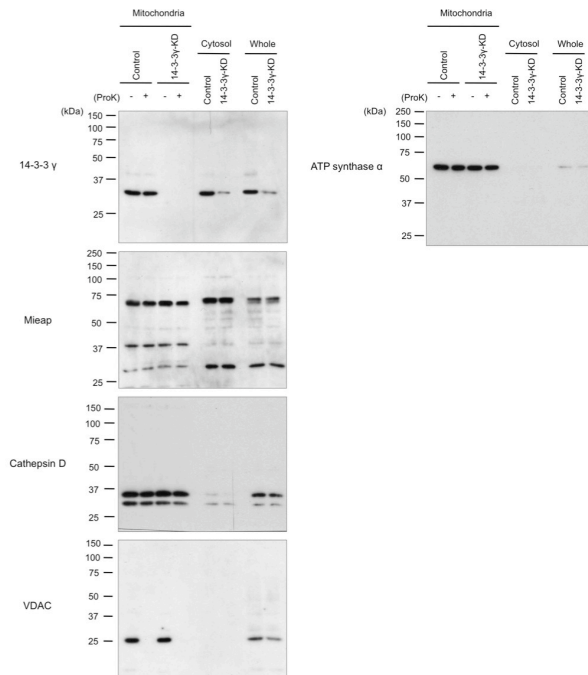

## Figure 4b

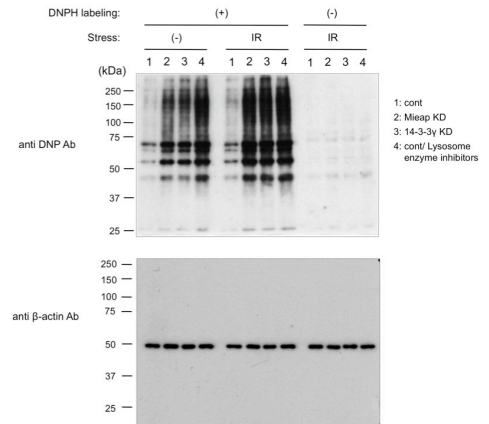

Supplement: srep00379-s1.pdf [file srep00379-s1.pdf]
